# Supplementary material for: TUT7 catalyzes the uridylation of the 3′ end for rapid degradation of histone mRNA
Source: PubMed Central journal article supplement — RNA. 2016 Nov;22(11):1673–88. doi: 10.1261/rna.058107.116 (PMC5066620; doi:10.1261/rna.058107.116), 2016-11

SUPPLEMENTARY MATERIAL FOR REVIEWERS:

Attached are the data for biological replicates of the TUT4 and TUT7 knockdowns.

Supplemental Fig. 1. (Biological replicate of Fig. 2 and Fig. 3). Effect of Tut7 knockdown of the 3' end of histone mRNA for the HIST2H2AA3 gene (A,B) and HIST1H2AG gene (C,D) in exponentially growing cells not treated with HU.

Supplementary Fig. 2. (Biological replicate of Fig. 2 and Fig. 3). Effect of Tut4 knockdown of the 3' end of histone mRNA for the HIST2H2AA3 gene (A,B) and HIST1H2AG gene (C,D) in exponentially growing cells not treated with HU.

Supplementary Figure 3. (Biological replicate of Fig. 4 and 5). A parallel culture to the samples in Supp. Figs. 1 and 2 was treated with HU to inhibit DNA synthesis, and RNA prepared after 30 minutes and the samples analyzed by sequencing. The results for the HIST2H2AA3 mRNA are shown from nts 0-7 (A-C), with the distribution of the 3' ends plotted in the pie charts (D and E). The results for nts 5-21 are shown in panels F-H.

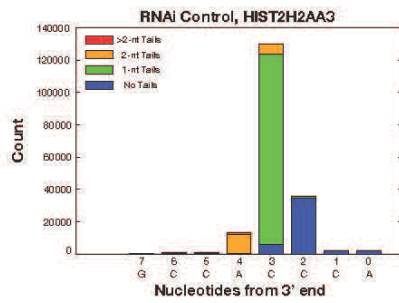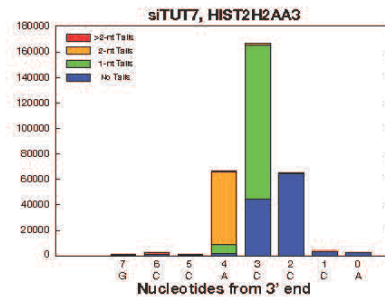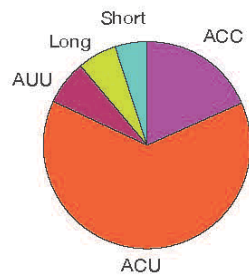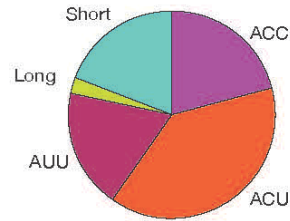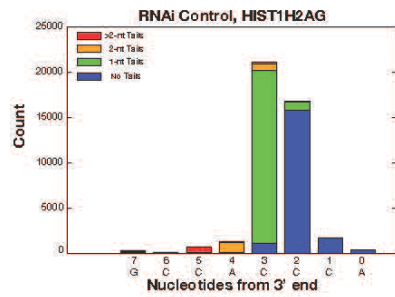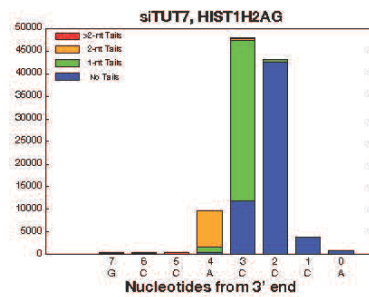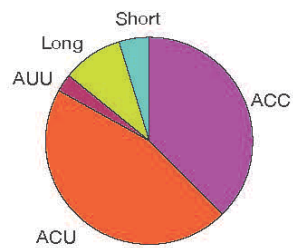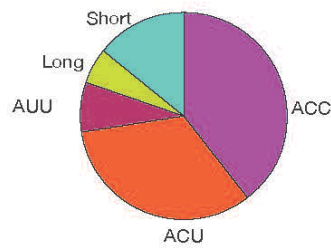

|            |         | ACC   | ACU   | AUU   | Long | Short |
|------------|---------|-------|-------|-------|------|-------|
| HIST2H2AA3 | siTUT7  | 20.9% | 39.0% | 18.6% | 2.4% | 19.0% |
|            | control | 18.6% | 63.5% | 6.8%  | 6.2% | 4.9%  |
| HIST1H2AG  | siTUT7  | 39.7% | 33.0% | 7.6%  | 5.6% | 14.1% |
|            | control | 37.6% | 45.5% | 2.9%  | 9.4% | 4.7%  |

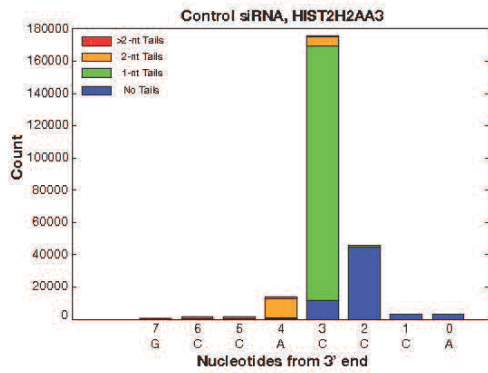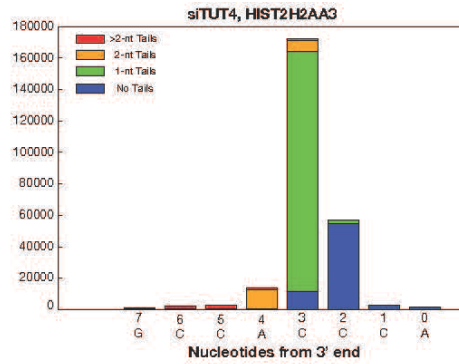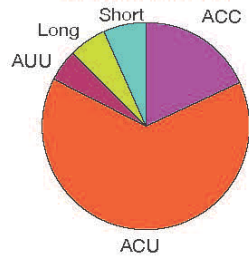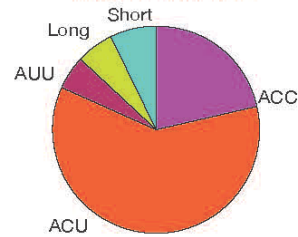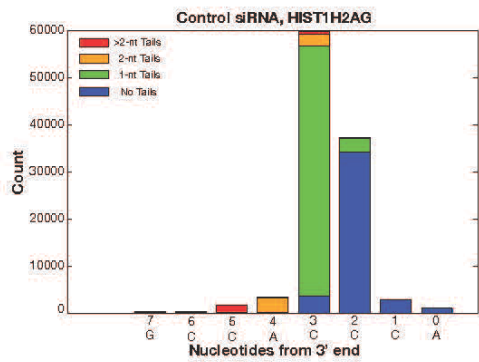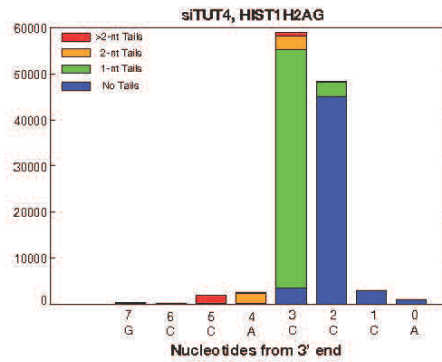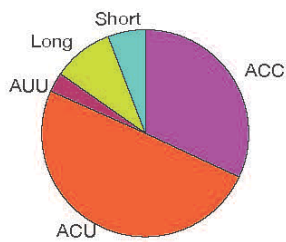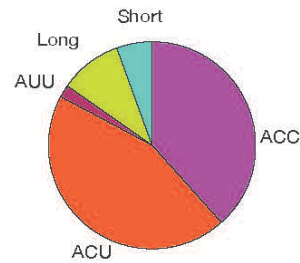

|            |         | ACC   | ACU   | AUU  | Long | Short |
|------------|---------|-------|-------|------|------|-------|
| HIST2H2AA3 | siTUT4  | 21.6% | 60.3% | 5.2% | 5.7% | 7.2%  |
|            | Control | 18.1% | 64.4% | 5.2% | 5.6% | 6.6%  |
| HIST1H2AG  | siTUT4  | 38.5% | 44.3% | 2.1% | 9.7% | 5.4%  |
|            | Control | 32.0% | 49.8% | 2.9% | 9.6% | 5.6%  |

SUPPLEMENTAL FIGURE 3

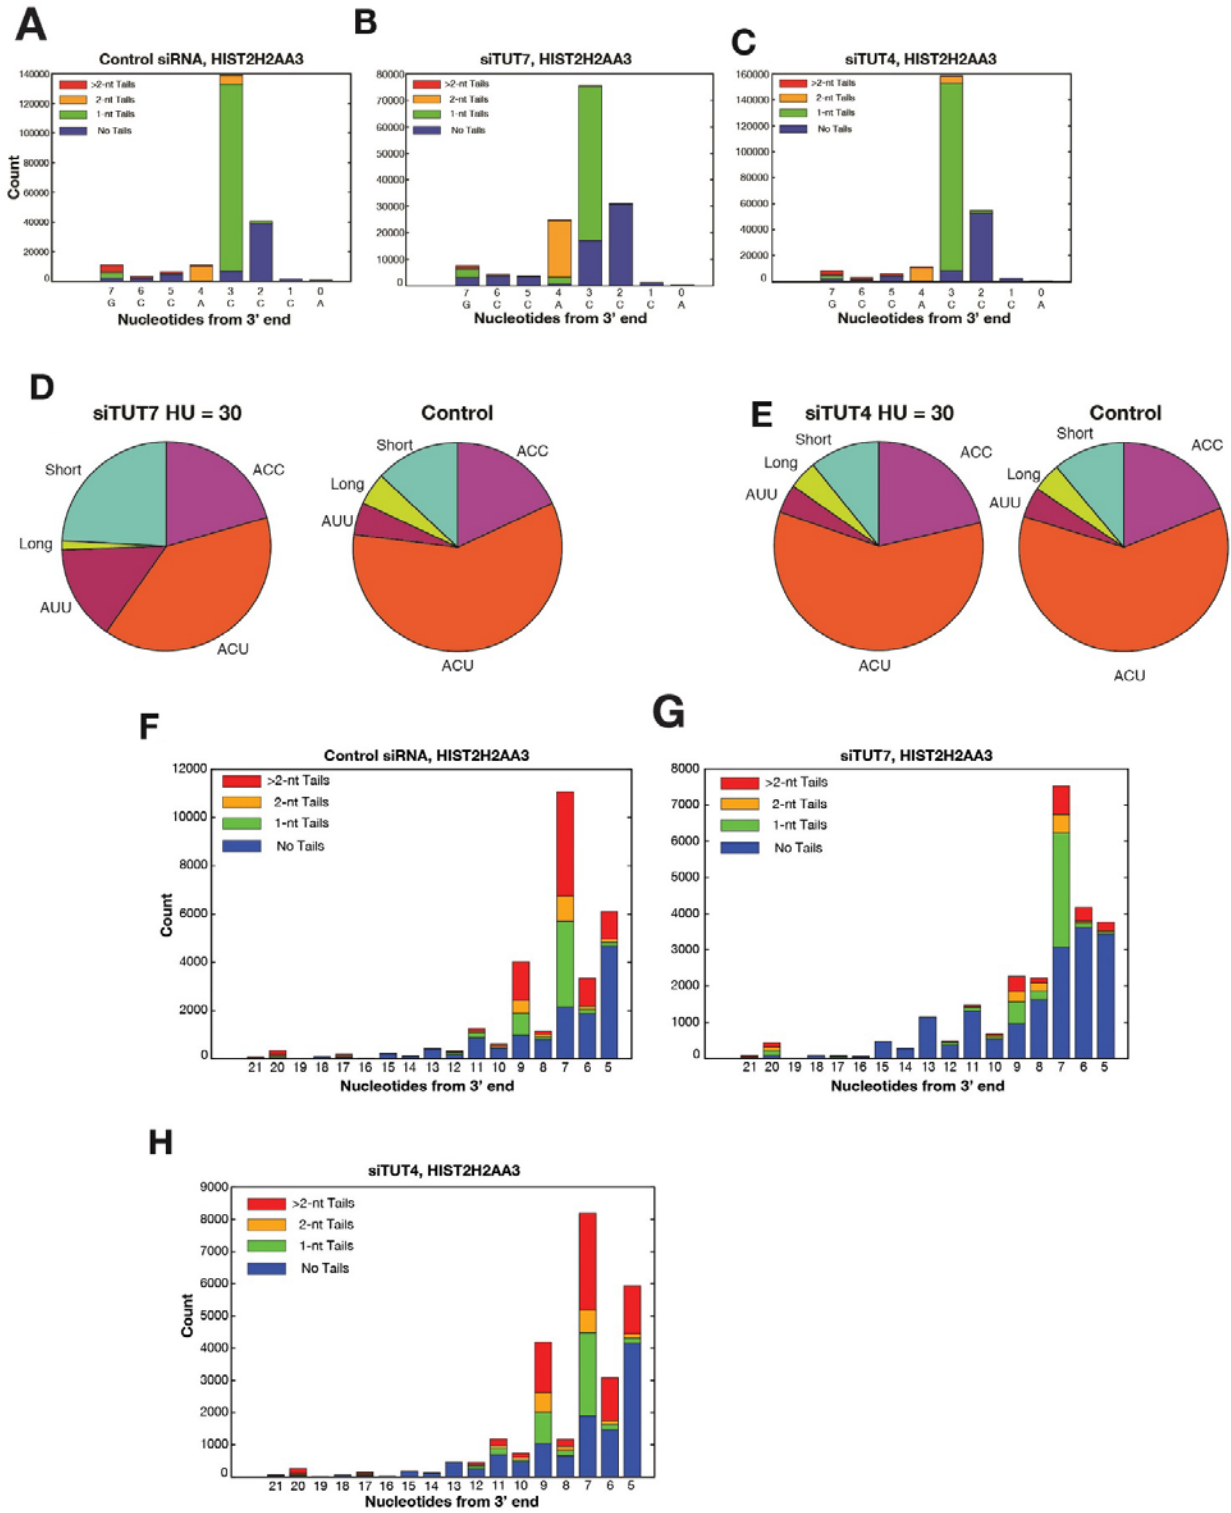

Supplement: supp_058107.116_Supp_Material.pdf [file supp_058107.116_Supp_Material.pdf]
